# Supplementary material
Source: Elsevier journal article supplement (https://www.sciencedirect.com/science/article/pii/S0211139X1100357X)
Supplement: mmc1 [file S0211139X1100357X:mmc1.pdf]

## Anexo I. Cuestionario

### 1-Hipertensión

|     |                                                                                                                                    |                                              |                                               |                                                                        |
|-----|------------------------------------------------------------------------------------------------------------------------------------|----------------------------------------------|-----------------------------------------------|------------------------------------------------------------------------|
| 1.1 | ¿Sabe que es la hipertensión?                                                                                                      | si <input type="checkbox"/>                  | no <input type="checkbox"/>                   |                                                                        |
| 1.2 | ¿Es la hipertensión una enfermedad para toda la vida?                                                                              | si <input type="checkbox"/>                  | no <input type="checkbox"/>                   | no se <input type="checkbox"/>                                         |
| 1.3 | ¿A partir de que valor se considera la presión arterial elevada?                                                                   | 140/90<br><input type="checkbox"/>           | 160/95<br><input type="checkbox"/>            | 130/85<br><input type="checkbox"/>                                     |
| 1.4 | ¿Cuál de las dos medidas sistólica (máxima) o diastólica (mínima) es más importante en el control y prevención de la hipertensión? | Sistólica máxima<br><input type="checkbox"/> | Diastólica mínima<br><input type="checkbox"/> | Ambas<br><input type="checkbox"/><br>No se<br><input type="checkbox"/> |
| 1.5 | ¿Conoce las cifras de su presión arterial?                                                                                         | si <input type="checkbox"/>                  | no <input type="checkbox"/>                   |                                                                        |
| 1.6 | ¿Es usted hipertenso?                                                                                                              | si <input type="checkbox"/>                  | no <input type="checkbox"/>                   | no se <input type="checkbox"/>                                         |
| 1.7 | ¿Le han explicado que es la hipertensión?                                                                                          | si <input type="checkbox"/>                  | no <input type="checkbox"/>                   | no se <input type="checkbox"/>                                         |
| 1.8 | ¿Algún médico le controla su presión arterial?                                                                                     | si <input type="checkbox"/>                  | no <input type="checkbox"/>                   | no se <input type="checkbox"/>                                         |
| 1.9 | ¿Se toma la presión con regularidad?                                                                                               | si <input type="checkbox"/>                  | no <input type="checkbox"/>                   | no se <input type="checkbox"/>                                         |
| 2.0 | ¿Dispone de un aparato de presión arterial en su domicilio?                                                                        | si <input type="checkbox"/>                  | no <input type="checkbox"/>                   | no se <input type="checkbox"/>                                         |

### 2-Factores de riesgo asociados hipertensión

|     |                                                                                                               |                             |                             |                                |
|-----|---------------------------------------------------------------------------------------------------------------|-----------------------------|-----------------------------|--------------------------------|
| 1.1 | ¿Conoce otros factores que favorecen el desarrollo de las enfermedades del corazón además de la hipertensión? | si <input type="checkbox"/> | no <input type="checkbox"/> | no se <input type="checkbox"/> |
| 1.2 | Podría decirme dos de estos factores de riesgo<br>.....                                                       |                             |                             |                                |
| 1.3 | ¿La obesidad es el factor casual más importante de la hipertensión?                                           | si <input type="checkbox"/> | no <input type="checkbox"/> | no se <input type="checkbox"/> |
| 1.4 | ¿El tabaquismo es un factor de riesgo cardiovascular asociado a la hipertensión?                              | si <input type="checkbox"/> | no <input type="checkbox"/> | no se <input type="checkbox"/> |
| 1.5 | ¿La diabetes y el colesterol son factores de riesgo asociados a la hipertensión?                              | si <input type="checkbox"/> | no <input type="checkbox"/> | no se <input type="checkbox"/> |
| 1.6 | ¿El ejercicio va bien para la presión arterial?                                                               | si <input type="checkbox"/> | no <input type="checkbox"/> | no se <input type="checkbox"/> |
| 1.7 | ¿Tienen más predisposición a la hipertensión las personas con antecedentes familiares?                        | si <input type="checkbox"/> | no <input type="checkbox"/> | no se <input type="checkbox"/> |

### 3-Riesgos hipertensión

|     |                                                                                    |                             |                             |                                |
|-----|------------------------------------------------------------------------------------|-----------------------------|-----------------------------|--------------------------------|
| 1.1 | ¿Le han informado sobre los riesgos que tiene la elevación de la presión arterial? | si <input type="checkbox"/> | no <input type="checkbox"/> | no se <input type="checkbox"/> |
| 1.2 | ¿La presión arterial puede provocar problemas en el corazón?                       | si <input type="checkbox"/> | no <input type="checkbox"/> | no se <input type="checkbox"/> |
| 1.3 | ¿La presión arterial puede provocar daños en el cerebro?                           | si <input type="checkbox"/> | no <input type="checkbox"/> | no se <input type="checkbox"/> |
| 1.4 | ¿La presión arterial puede provocar problemas con el riñón?                        | si <input type="checkbox"/> | no <input type="checkbox"/> | no se <input type="checkbox"/> |

#### 4-Dieta

|     |                                                                                                                           |                             |                             |                                |
|-----|---------------------------------------------------------------------------------------------------------------------------|-----------------------------|-----------------------------|--------------------------------|
| 1.1 | ¿Una dieta pobre en grasas y rica en frutas y verduras es fundamental para facilitar la reducción de la presión arterial? | si <input type="checkbox"/> | no <input type="checkbox"/> | no se <input type="checkbox"/> |
| 1.2 | ¿Es aconsejable reducir el consumo de sal?                                                                                | si <input type="checkbox"/> | no <input type="checkbox"/> | no se <input type="checkbox"/> |
| 1.3 | ¿ Se puede controlar con dieta la hipertensión?                                                                           | si <input type="checkbox"/> | no <input type="checkbox"/> | no se <input type="checkbox"/> |

#### 5-Medicación

|     |                                                                                                    |                             |                             |                                |
|-----|----------------------------------------------------------------------------------------------------|-----------------------------|-----------------------------|--------------------------------|
| 1.1 | ¿Se puede controlar con medicación la hipertensión?                                                | si <input type="checkbox"/> | no <input type="checkbox"/> | no se <input type="checkbox"/> |
| 1.2 | ¿Toma medicación para la hipertensión?                                                             | si <input type="checkbox"/> | no <input type="checkbox"/> | no se <input type="checkbox"/> |
| 1.3 | ¿Hay que tomar la medicación para toda la vida?                                                    | si <input type="checkbox"/> | no <input type="checkbox"/> | no se <input type="checkbox"/> |
| 1.4 | ¿Se puede aumentar la dosis de la medicación si le sube más la presión, sin consultar a su médico? | si <input type="checkbox"/> | no <input type="checkbox"/> | no se <input type="checkbox"/> |
| 1.5 | ¿Se puede disminuir la dosis de la medicación si le baja la presión, sin consultar a su médico?    | si <input type="checkbox"/> | no <input type="checkbox"/> | no se <input type="checkbox"/> |
| 1.6 | ¿Se puede dejar el tratamiento cuando la presión se normaliza?                                     | si <input type="checkbox"/> | no <input type="checkbox"/> | no se <input type="checkbox"/> |
